# Supplementary material for: Field Trials Reveal Ecotype-Specific Responses to Mycorrhizal Inoculation in Rice
Source: PubMed Central journal article supplement (PMC5132163; doi:10.1371/journal.pone.0167014), 2016-12-01
Supplement: pone.0167014.s003.pdf [file pone.0167014.s003.pdf]

**S1 Table. Root length and frequency of colonization of inoculated plants of *O. sativa* var. Sahel 202 for the 1<sup>st</sup> and 2<sup>nd</sup>-year trials.** In each column, means followed by the same letter are not significantly different at  $P \leq 0.05$ .

| Traitment                  | Root lenght colonization |                      | Frequency of colonization |                      |
|----------------------------|--------------------------|----------------------|---------------------------|----------------------|
|                            | 1 <sup>st</sup> year     | 2 <sup>nd</sup> year | 1 <sup>st</sup> year      | 2 <sup>nd</sup> year |
| Ri                         | 60.08 ab                 | 38.70 d              | 98.19 a                   | 92.00 cd             |
| Ri + ORS278                | 52.54 b                  | 38.70 d              | 94.14 ab                  | 92.00 cd             |
| Ri + ORS3454               | 56.60 ab                 | 36.85 def            | 98.29 a                   | 90.50 de             |
| Ri + ORS278 + ORS3454      | 51.62 b                  | 32.50 f              | 99.34 a                   | 86.50 ef             |
| Ga                         | 49.33 b                  | 55.41 a              | 93.82 ab                  | 98.00 ab             |
| Ga + ORS278                | 55.35 b                  | 50.08 bc             | 98.60 a                   | 97.00 abc            |
| Ga + ORS3454               | 52.24 b                  | 53.75 ab             | 98.64 a                   | 98.50 a              |
| Ga + ORS278 + ORS3454      | 57.65 ab                 | 55.28 a              | 97.25 ab                  | 96.50 abc            |
| Ga + Ri                    | 53.94 b                  | 47.33 c              | 97.49 a                   | 94.50 abcd           |
| Ga + Ri + ORS278           | 61.56 ab                 | 34.10 def            | 98.23 a                   | 86.00 ef             |
| Ga + Ri + ORS3454          | 50.24 b                  | 33.70 ef             | 93.74 ab                  | 85.00 f              |
| Ga + Ri + ORS278 + ORS3454 | 71.58 a                  | 37.60 de             | 99.40 a                   | 93.00 bcd            |
