# Supplementary material for: Field Trials Reveal Ecotype-Specific Responses to Mycorrhizal Inoculation in Rice
Source: PubMed Central journal article supplement (PMC5132163; doi:10.1371/journal.pone.0167014), 2016-12-01
Supplement: pone.0167014.s004.pdf [file pone.0167014.s004.pdf]

**S2 Table. ANOVA for the  $\ln(x + 10)$  transformed values of agronomic traits in rice plants at variety level.** AMF inoculation (inoculated and non-inoculated), variety (each of the 8 varieties tested) and year (1<sup>st</sup> and 2<sup>nd</sup>-year trial).

| Yield                        |    |        |       |        |          |
|------------------------------|----|--------|-------|--------|----------|
| Source of variation          | df | SS     | MS    | F      | P        |
| AMF inoculation (AMF n = 2)  | 1  | 0.641  | 0.641 | 7.654  | 0.007    |
| Variety (Var n = 8)          | 7  | 10.563 | 1.509 | 18.006 | < 0.0001 |
| Year (Yr n = 2)              | 1  | 1.091  | 1.091 | 13.022 | 0.001    |
| AMF x Var                    | 7  | 5.028  | 0.718 | 8.571  | < 0.0001 |
| AMF x Yr                     | 1  | 0.192  | 0.192 | 2.289  | 0.135    |
| Var x Yr                     | 7  | 5.522  | 0.789 | 9.414  | < 0.0001 |
| AMF x Var x yr               | 7  | 2.367  | 0.338 | 4.035  | 0.001    |
| Error                        | 64 |        |       |        |          |
| Biomass                      |    |        |       |        |          |
| Source of variation          | df | SS     | MS    | F      | P        |
| AMF inoculation (AMF n = 2)  | 1  | 0.003  | 0.003 | 0.057  | 0.811    |
| Variety (Var n = 8)          | 7  | 10.675 | 1.525 | 28.690 | < 0.0001 |
| Year (Yr n = 2)              | 1  | 2.250  | 2.250 | 42.322 | < 0.0001 |
| AMF x Var                    | 7  | 1.397  | 0.200 | 3.754  | 0.002    |
| AMF x Yr                     | 1  | 0.082  | 0.082 | 1.549  | 0.218    |
| Var x Yr                     | 7  | 1.166  | 0.167 | 3.132  | 0.007    |
| AMF x Var x yr               | 7  | 0.640  | 0.091 | 1.720  | 0.120    |
| Error                        | 64 |        |       |        |          |
| Harvest index (HI)           |    |        |       |        |          |
| Source of variation          | df | SS     | MS    | F      | P        |
| AMF inoculation (AMF n = 2)  | 1  | 0.767  | 0.767 | 19.626 | < 0.0001 |
| Variety (Var n = 8)          | 7  | 1.706  | 0.244 | 6.237  | < 0.0001 |
| Year (Yr n = 2)              | 1  | 0.535  | 0.535 | 13.696 | 0.000    |
| AMF x Var                    | 7  | 1.239  | 0.177 | 4.530  | 0.000    |
| AMF x Yr                     | 1  | 0.134  | 0.134 | 3.434  | 0.068    |
| Var x Yr                     | 7  | 2.244  | 0.321 | 8.207  | < 0.0001 |
| AMF x Var x yr               | 7  | 0.596  | 0.085 | 2.178  | 0.048    |
| Error                        | 64 |        |       |        |          |
| 1000 grains weight (1000GWT) |    |        |       |        |          |
| Source of variation          | df | SS     | MS    | F      | P        |
| AMF inoculation (AMF n = 2)  | 1  | 0.012  | 0.012 | 0.276  | 0.601    |
| Variety (Var n = 8)          | 7  | 0.457  | 0.065 | 1.510  | 0.180    |
| Year (Yr n = 2)              | 1  | 0.078  | 0.078 | 1.804  | 0.184    |
| AMF x Var                    | 7  | 0.211  | 0.030 | 0.699  | 0.673    |

|                |    |       |       |       |       |
|----------------|----|-------|-------|-------|-------|
| AMF x Yr       | 1  | 0.010 | 0.010 | 0.231 | 0.633 |
| Var x Yr       | 7  | 0.255 | 0.036 | 0.844 | 0.555 |
| AMF x Var x yr | 7  | 0.153 | 0.021 | 0.507 | 0.827 |
| Error          | 64 |       |       |       |       |

#### Height

| Source of variation         | df | SS    | MS    | F      | P        |
|-----------------------------|----|-------|-------|--------|----------|
| AMF inoculation (AMF n = 2) | 1  | 0.000 | 0.000 | 0.008  | 0.931    |
| Variety (Var n = 8)         | 7  | 0.863 | 0.123 | 28.096 | < 0.0001 |
| Year (Yr n = 2)             | 1  | 0.009 | 0.009 | 1.982  | 0.164    |
| AMF x Var                   | 7  | 0.021 | 0.003 | 0.693  | 0.678    |
| AMF x Yr                    | 1  | 0.000 | 0.000 | 0.013  | 0.909    |
| Var x Yr                    | 7  | 0.019 | 0.003 | 0.618  | 0.739    |
| AMF x Var x yr              | 7  | 0.050 | 0.007 | 1.617  | 0.147    |
| Error                       | 64 |       |       |        |          |

#### Tillers

| Source of variation         | df | SS    | MS    | F       | P        |
|-----------------------------|----|-------|-------|---------|----------|
| AMF inoculation (AMF n = 2) | 1  | 0.003 | 0.003 | 0.135   | 0.714    |
| Variety (Var n = 8)         | 7  | 7.396 | 1.057 | 41.449  | < 0.0001 |
| Year (Yr n = 2)             | 1  | 4.389 | 4.389 | 172.169 | < 0.0001 |
| AMF x Var                   | 7  | 0.424 | 0.061 | 2.374   | 0.032    |
| AMF x Yr                    | 1  | 0.300 | 0.300 | 11.782  | 0.001    |
| Var x Yr                    | 7  | 0.855 | 0.122 | 4.789   | 0.000    |
| AMF x Var x yr              | 7  | 0.511 | 0.073 | 2.866   | 0.011    |
| Error                       | 64 |       |       |         |          |

#### Heading

| Source of variation         | df | SS    | MS    | F      | P        |
|-----------------------------|----|-------|-------|--------|----------|
| AMF inoculation (AMF n = 2) | 1  | 0.006 | 0.006 | 4.996  | 0.029    |
| Variety (Var n = 8)         | 7  | 0.687 | 0.098 | 79.494 | < 0.0001 |
| Year (Yr n = 2)             | 1  | 0.045 | 0.045 | 36.369 | < 0.0001 |
| AMF x Var                   | 7  | 0.008 | 0.001 | 0.931  | 0.489    |
| AMF x Yr                    | 1  | 0.002 | 0.002 | 1.252  | 0.267    |
| Var x Yr                    | 7  | 0.112 | 0.016 | 12.947 | < 0.0001 |
| AMF x Var x yr              | 7  | 0.014 | 0.002 | 1.605  | 0.150    |
| Error                       | 64 |       |       |        |          |

#### Maturity

| Source of variation         | df | SS    | MS    | F       | P        |
|-----------------------------|----|-------|-------|---------|----------|
| AMF inoculation (AMF n = 2) | 1  | 0.005 | 0.005 | 8.496   | 0.005    |
| Variety (Var n = 8)         | 7  | 0.496 | 0.071 | 124.127 | < 0.0001 |
| Year (Yr n = 2)             | 1  | 0.089 | 0.089 | 155.334 | < 0.0001 |
| AMF x Var                   | 7  | 0.005 | 0.001 | 1.240   | 0.295    |
| AMF x Yr                    | 1  | 0.003 | 0.003 | 5.389   | 0.023    |
| Var x Yr                    | 7  | 0.063 | 0.009 | 15.861  | < 0.0001 |

|                |    |       |       |       |       |
|----------------|----|-------|-------|-------|-------|
| AMF x Var x yr | 7  | 0.006 | 0.001 | 1.624 | 0.145 |
| Error          | 64 |       |       |       |       |

---

Grain filling duration (GFD)

---

| Source of variation         | df | SS    | MS    | F      | P        |
|-----------------------------|----|-------|-------|--------|----------|
| AMF inoculation (AMF n = 2) | 1  | 0.001 | 0.001 | 0.089  | 0.767    |
| Variety (Var n = 8)         | 7  | 0.622 | 0.089 | 11.249 | < 0.0001 |
| Year (Yr n = 2)             | 1  | 0.223 | 0.223 | 28.209 | < 0.0001 |
| AMF x Var                   | 7  | 0.038 | 0.005 | 0.693  | 0.677    |
| AMF x Yr                    | 1  | 0.005 | 0.005 | 0.585  | 0.447    |
| Var x Yr                    | 7  | 0.533 | 0.076 | 9.643  | < 0.0001 |
| AMF x Var x yr              | 7  | 0.076 | 0.011 | 1.370  | 0.233    |
| Error                       | 64 |       |       |        |          |

---

Fertility

---

| Source of variation         | df | SS    | MS    | F      | P        |
|-----------------------------|----|-------|-------|--------|----------|
| AMF inoculation (AMF n = 2) | 1  | 0.597 | 0.597 | 25.018 | < 0.0001 |
| Variety (Var n = 8)         | 7  | 0.511 | 0.073 | 3.060  | 0.008    |
| Year (Yr n = 2)             | 1  | 2.183 | 2.183 | 91.508 | < 0.0001 |
| AMF x Var                   | 7  | 0.770 | 0.110 | 4.611  | 0.000    |
| AMF x Yr                    | 1  | 0.252 | 0.252 | 10.576 | 0.002    |
| Var x Yr                    | 7  | 0.355 | 0.051 | 2.125  | 0.053    |
| AMF x Var x yr              | 7  | 0.358 | 0.051 | 2.143  | 0.051    |
| Error                       | 64 |       |       |        |          |

---
