# Supplementary material for: Field Trials Reveal Ecotype-Specific Responses to Mycorrhizal Inoculation in Rice
Source: PubMed Central journal article supplement (PMC5132163; doi:10.1371/journal.pone.0167014), 2016-12-01
Supplement: pone.0167014.s005.pdf [file pone.0167014.s005.pdf]

**S3 Table. Student's t-test for the ln (x +10) transformed values of agronomic traits in rice plants at variety level.** AM = inoculated with AMF and NM = non-inoculated. Abbreviations associated to the variety names indicate the rice ecotype (Upl = Upland, Irr = Irrigated, Rll = Rainfed lowland).

| Yield                        |                  |              |                 |                 |                   |              |                 |                 |
|------------------------------|------------------|--------------|-----------------|-----------------|-------------------|--------------|-----------------|-----------------|
| Variety                      | First year trial |              |                 |                 | Second year trial |              |                 |                 |
|                              | AM               | NM           | <i>t</i> -value | <i>P</i> -value | AM                | NM           | <i>t</i> -value | <i>P</i> -value |
| NERICA4-Upl                  | <b>8.214</b>     | <b>6.241</b> | <b>2.915</b>    | <b>0.043</b>    | <b>8.437</b>      | <b>7.937</b> | <b>2.810</b>    | <b>0.048</b>    |
| WAB56-104-Upl                | <b>7.773</b>     | <b>7.072</b> | <b>4.031</b>    | <b>0.016</b>    | 8.098             | 8.102        | -0.003          | 0.934           |
| CG14-Upl                     | 8.134            | 8.327        | -0.531          | 0.623           | <b>8.538</b>      | <b>8.271</b> | <b>5.355</b>    | <b>0.006</b>    |
| IR64-Irr                     | 8.485            | 8.546        | -0.297          | 0.782           | <b>8.717</b>      | <b>8.350</b> | <b>5.212</b>    | <b>0.006</b>    |
| Sahel202-Irr                 | 8.499            | 8.542        | -0.309          | 0.773           | <b>8.565</b>      | <b>8.281</b> | <b>4.394</b>    | <b>0.012</b>    |
| Sahel108-Irr                 | 8.340            | 8.380        | -0.433          | 0.687           | <b>8.949</b>      | <b>9.101</b> | <b>-6.406</b>   | <b>0.003</b>    |
| NERICA-L-19-Rll              | 8.569            | 8.766        | -0.750          | 0.495           | <b>7.761</b>      | <b>8.426</b> | <b>-4.310</b>   | <b>0.013</b>    |
| TOG5681-Rll                  | 8.351            | 8.469        | -0.484          | 0.654           | 8.292             | 8.297        | -0.069          | 0.948           |
| Biomass                      |                  |              |                 |                 |                   |              |                 |                 |
| Variety                      | First year trial |              |                 |                 | Second year trial |              |                 |                 |
|                              | AM               | NM           | <i>t</i> -value | <i>P</i> -value | AM                | NM           | <i>t</i> -value | <i>P</i> -value |
| NERICA4-Upl                  | <b>9.057</b>     | <b>8.530</b> | <b>4.970</b>    | <b>0.008</b>    | 9.285             | 8.984        | 1.829           | 0.141           |
| WAB56-104-Upl                | 8.557            | 8.328        | 0.756           | 0.492           | 8.963             | 9.317        | -2.247          | 0.088           |
| CG14-Upl                     | 9.233            | 9.420        | -1.059          | 0.349           | 9.448             | 9.733        | -0.984          | 0.381           |
| IR64-Irr                     | 9.445            | 9.497        | -0.300          | 0.778           | 9.555             | 9.352        | 1.899           | 0.130           |
| Sahel202-Irr                 | 9.784            | 9.622        | 1.338           | 0.252           | 10.131            | 9.530        | 1.947           | 0.123           |
| Sahel108-Irr                 | 9.341            | 9.265        | 0.685           | 0.531           | <b>9.525</b>      | <b>9.945</b> | <b>-4.970</b>   | <b>0.008</b>    |
| NERICA-L-19-Rll              | 9.571            | 9.545        | 0.133           | 0.901           | 9.951             | 10.171       | -1.901          | 0.130           |
| TOG5681-Rll                  | 9.157            | 9.379        | -1.623          | 0.180           | 9.268             | 9.472        | -0.831          | 0.453           |
| Harvest index (HI)           |                  |              |                 |                 |                   |              |                 |                 |
| Variety                      | First year trial |              |                 |                 | Second year trial |              |                 |                 |
|                              | AM               | NM           | <i>t</i> -value | <i>P</i> -value | AM                | NM           | <i>t</i> -value | <i>P</i> -value |
| NERICA4-Upl                  | <b>4.132</b>     | <b>3.118</b> | <b>3.325</b>    | <b>0.029</b>    | 3.969             | 3.810        | 1.097           | 0.334           |
| WAB56-104-Upl                | <b>4.107</b>     | <b>3.628</b> | <b>3.899</b>    | <b>0.018</b>    | 3.953             | 3.684        | 2.101           | 0.104           |
| CG14-Upl                     | 3.938            | 3.780        | 0.606           | 0.577           | 3.918             | 3.518        | 1.781           | 0.150           |
| IR64-Irr                     | <b>4.031</b>     | <b>3.897</b> | <b>3.517</b>    | <b>0.025</b>    | 3.975             | 3.843        | 1.676           | 0.169           |
| Sahel202-Irr                 | 3.782            | 3.791        | -0.158          | 0.882           | 3.431             | 3.668        | -1.156          | 0.312           |
| Sahel108-Irr                 | 3.999            | 3.944        | 0.603           | 0.579           | <b>4.193</b>      | <b>3.970</b> | <b>3.291</b>    | <b>0.030</b>    |
| NERICA-L-19-Rll              | 4.007            | 4.034        | -0.185          | 0.862           | <b>3.054</b>      | <b>3.314</b> | <b>-3.133</b>   | <b>0.035</b>    |
| TOG5681-Rll                  | 4.157            | 3.933        | 1.884           | 0.133           | 3.866             | 3.720        | 0.692           | 0.527           |
| 1000 grains weight (1000GWT) |                  |              |                 |                 |                   |              |                 |                 |
| Variety                      | First year trial |              |                 |                 | Second year trial |              |                 |                 |
|                              | AM               | NM           | <i>t</i> -value | <i>P</i> -value | AM                | NM           | <i>t</i> -value | <i>P</i> -value |
| NERICA4-Upl                  | 3.638            | 3.345        | 0.541           | 0.617           | 3.514             | 3.470        | 0.654           | 0.549           |
| WAB56-104-Upl                | 3.715            | 3.548        | 1.104           | 0.331           | 3.572             | 3.520        | 0.505           | 0.640           |
| CG14-Upl                     | 3.663            | 3.696        | -0.980          | 0.382           | 3.369             | 3.444        | -1.020          | 0.365           |
| IR64-Irr                     | <b>3.555</b>     | <b>3.486</b> | <b>4.474</b>    | <b>0.011</b>    | <b>3.514</b>      | <b>3.350</b> | <b>3.016</b>    | <b>0.039</b>    |
| Sahel202-Irr                 | 3.581            | 3.444        | 0.942           | 0.399           | 3.419             | 3.477        | -0.538          | 0.620           |

|                 |       |       |        |       |       |       |        |       |
|-----------------|-------|-------|--------|-------|-------|-------|--------|-------|
| Sahel108-Irr    | 3.359 | 3.366 | -0.070 | 0.948 | 3.344 | 3.526 | -0.959 | 0.392 |
| NERICA-L-19-Rll | 3.494 | 3.624 | -1.474 | 0.214 | 3.662 | 3.590 | 0.447  | 0.678 |
| TOG5681-Rll     | 3.578 | 3.733 | -1.523 | 0.203 | 3.569 | 3.573 | -0.123 | 0.908 |

#### Height

| Variety         | First year trial |       |                 |                 | Second year trial |              |                 |                 |
|-----------------|------------------|-------|-----------------|-----------------|-------------------|--------------|-----------------|-----------------|
|                 | AM               | NM    | <i>t</i> -value | <i>P</i> -value | AM                | NM           | <i>t</i> -value | <i>P</i> -value |
| NERICA4-Upl     | 4.713            | 4.721 | -0.162          | 0.880           | 4.697             | 4.725        | -1.052          | 0.352           |
| WAB56-104-Upl   | 4.576            | 4.550 | 0.330           | 0.758           | 4.542             | 4.584        | -1.067          | 0.346           |
| CG14-Upl        | 4.720            | 4.752 | -0.534          | 0.621           | 4.690             | 4.722        | -1.240          | 0.283           |
| IR64-Irr        | 4.473            | 4.490 | -0.292          | 0.785           | 4.502             | 4.510        | -0.381          | 0.723           |
| Sahel202-Irr    | 4.471            | 4.582 | -1.519          | 0.203           | 4.644             | 4.536        | 2.104           | 0.103           |
| Sahel108-Irr    | 4.481            | 4.466 | 0.702           | 0.521           | 4.497             | 4.488        | 0.385           | 0.720           |
| NERICA-L-19-Rll | 4.566            | 4.513 | 0.408           | 0.704           | <b>4.551</b>      | <b>4.613</b> | <b>-3.434</b>   | <b>0.026</b>    |
| TOG5681-Rll     | 4.465            | 4.394 | 1.832           | 0.141           | <b>4.506</b>      | <b>4.430</b> | <b>5.211</b>    | <b>0.006</b>    |

#### Tillers

| Variety         | First year trial |       |                 |                 | Second year trial |              |                 |                 |
|-----------------|------------------|-------|-----------------|-----------------|-------------------|--------------|-----------------|-----------------|
|                 | AM               | NM    | <i>t</i> -value | <i>P</i> -value | AM                | NM           | <i>t</i> -value | <i>P</i> -value |
| NERICA4-Upl     | 5.162            | 5.082 | 0.774           | 0.482           | 5.782             | 5.359        | 2.125           | 0.101           |
| WAB56-104-Upl   | 4.891            | 5.158 | -1.932          | 0.126           | 5.763             | 5.639        | 0.622           | 0.568           |
| CG14-Upl        | 5.830            | 5.957 | -0.744          | 0.498           | <b>6.303</b>      | <b>6.040</b> | <b>3.018</b>    | <b>0.039</b>    |
| IR64-Irr        | 5.859            | 5.832 | 0.178           | 0.868           | 6.199             | 6.147        | 0.450           | 0.676           |
| Sahel202-Irr    | 5.727            | 5.949 | -1.308          | 0.261           | <b>6.231</b>      | <b>5.747</b> | <b>6.210</b>    | <b>0.003</b>    |
| Sahel108-Irr    | 5.683            | 5.613 | 0.698           | 0.524           | <b>6.103</b>      | <b>6.378</b> | <b>-7.715</b>   | <b>0.002</b>    |
| NERICA-L-19-Rll | 5.640            | 5.716 | -0.456          | 0.672           | 6.371             | 6.336        | 0.647           | 0.553           |
| TOG5681-Rll     | 5.743            | 6.028 | -2.655          | 0.057           | <b>6.099</b>      | <b>6.213</b> | <b>-3.769</b>   | <b>0.020</b>    |

#### Heading

| Variety         | First year trial |              |                 |                 | Second year trial |       |                 |                 |
|-----------------|------------------|--------------|-----------------|-----------------|-------------------|-------|-----------------|-----------------|
|                 | AM               | NM           | <i>t</i> -value | <i>P</i> -value | AM                | NM    | <i>t</i> -value | <i>P</i> -value |
| NERICA4-Upl     | <b>4.442</b>     | <b>4.331</b> | <b>4.729</b>    | <b>0.009</b>    | 4.430             | 4.430 | 0.000           | 1.000           |
| WAB56-104-Upl   | 4.418            | 4.419        | -0.017          | 0.987           | 4.423             | 4.423 | 0.000           | 1.000           |
| CG14-Upl        | 4.422            | 4.446        | -0.691          | 0.527           | 4.430             | 4.386 | 1.735           | 0.158           |
| IR64-Irr        | 4.514            | 4.473        | 1.533           | 0.200           | 4.685             | 4.685 | 0.000           | 1.000           |
| Sahel202-Irr    | 4.538            | 4.546        | -0.164          | 0.878           | 4.618             | 4.618 | 0.000           | 1.000           |
| Sahel108-Irr    | 4.492            | 4.458        | 1.285           | 0.268           | 4.442             | 4.423 | 0.677           | 0.535           |
| NERICA-L-19-Rll | 4.611            | 4.573        | 0.790           | 0.474           | 4.625             | 4.625 | 0.000           | 1.000           |
| TOG5681-Rll     | 4.369            | 4.369        | -0.015          | 0.989           | 4.435             | 4.435 | 0.000           | 1.000           |

#### Maturity

| Variety         | First year trial |              |                 |                 | Second year trial |       |                 |                 |
|-----------------|------------------|--------------|-----------------|-----------------|-------------------|-------|-----------------|-----------------|
|                 | AM               | NM           | <i>t</i> -value | <i>P</i> -value | AM                | NM    | <i>t</i> -value | <i>P</i> -value |
| NERICA4-Upl     | 4.763            | 4.670        | 2.280           | 0.085           | 4.748             | 4.748 | 0.000           | 1.000           |
| WAB56-104-Upl   | 4.801            | 4.758        | 1.028           | 0.362           | 4.754             | 4.754 | 0.000           | 1.000           |
| CG14-Upl        | <b>4.691</b>     | <b>4.660</b> | <b>4.533</b>    | <b>0.011</b>    | 4.718             | 4.713 | 0.999           | 0.374           |
| IR64-Irr        | 4.804            | 4.804        | 0.000           | 1.000           | 4.939             | 4.939 | 0.000           | 1.000           |
| Sahel202-Irr    | 4.787            | 4.768        | 2.079           | 0.106           | 4.903             | 4.903 | 0.000           | 1.000           |
| Sahel108-Irr    | 4.679            | 4.685        | -0.707          | 0.519           | 4.756             | 4.739 | 0.903           | 0.417           |
| NERICA-L-19-Rll | 4.817            | 4.795        | 0.785           | 0.477           | 4.900             | 4.900 | 0.000           | 1.000           |

|                              |                  |              |                 |                 |                   |              |                 |                 |
|------------------------------|------------------|--------------|-----------------|-----------------|-------------------|--------------|-----------------|-----------------|
| TOG5681-Rll                  | 4.663            | 4.663        | 0.000           | 1.000           | 4.685             | 4.685        | 0.000           | 1.000           |
| Grain filling duration (GFD) |                  |              |                 |                 |                   |              |                 |                 |
|                              | First year trial |              |                 |                 | Second year trial |              |                 |                 |
| Variety                      | AM               | NM           | <i>t</i> -value | <i>P</i> -value | AM                | NM           | <i>t</i> -value | <i>P</i> -value |
| NERICA4-Upl                  | 3.740            | 3.705        | 0.431           | 0.689           | 3.719             | 3.719        | 0.000           | 1.000           |
| WAB56-104-Upl                | 3.883            | 3.768        | 1.108           | 0.330           | 3.752             | 3.752        | 0.000           | 1.000           |
| CG14-Upl                     | 3.571            | 3.406        | 1.758           | 0.154           | 3.636             | 3.712        | -1.291          | 0.266           |
| IR64-Irr                     | 3.702            | 3.792        | -1.465          | 0.216           | 3.721             | 3.721        | 0.000           | 1.000           |
| Sahel202-Irr                 | 3.585            | 3.499        | 0.693           | 0.527           | 3.769             | 3.769        | 0.000           | 1.000           |
| Sahel108-Irr                 | 3.340            | 3.465        | -1.971          | 0.120           | 3.720             | 3.711        | 0.132           | 0.902           |
| NERICA-L-19-Rll              | 3.494            | 3.524        | -0.455          | 0.673           | 3.744             | 3.744        | 0.000           | 1.000           |
| TOG5681-Rll                  | 3.608            | 3.610        | -0.030          | 0.977           | 3.523             | 3.523        | 0.000           | 1.000           |
| Fertility                    |                  |              |                 |                 |                   |              |                 |                 |
|                              | First year trial |              |                 |                 | Second year trial |              |                 |                 |
| Variety                      | AM               | NM           | <i>t</i> -value | <i>P</i> -value | AM                | NM           | <i>t</i> -value | <i>P</i> -value |
| NERICA4-Upl                  | 4.495            | 3.300        | 2.665           | 0.056           | <b>4.592</b>      | <b>4.392</b> | <b>5.378</b>    | <b>0.006</b>    |
| WAB56-104-Upl                | 4.416            | 4.170        | 2.360           | 0.078           | 4.501             | 4.431        | 1.459           | 0.218           |
| CG14-Upl                     | <b>4.450</b>     | <b>4.303</b> | <b>3.253</b>    | <b>0.031</b>    | 4.579             | 4.562        | 1.894           | 0.131           |
| IR64-Irr                     | 4.303            | 4.175        | 0.916           | 0.412           | 4.630             | 4.583        | 1.978           | 0.119           |
| Sahel202-Irr                 | 4.228            | 4.072        | 1.278           | 0.270           | 4.618             | 4.571        | 1.794           | 0.147           |
| Sahel108-Irr                 | 4.429            | 4.239        | 1.847           | 0.138           | <b>4.626</b>      | <b>4.600</b> | <b>3.805</b>    | <b>0.019</b>    |
| NERICA-L-19-Rll              | 4.423            | 4.267        | 2.334           | 0.080           | 4.550             | 4.481        | 1.320           | 0.257           |
| TOG5681-Rll                  | 4.321            | 4.302        | 0.106           | 0.921           | 4.562             | 4.594        | -0.821          | 0.458           |
