# Supplementary material for: Field Trials Reveal Ecotype-Specific Responses to Mycorrhizal Inoculation in Rice
Source: PubMed Central journal article supplement (PMC5132163; doi:10.1371/journal.pone.0167014), 2016-12-01
Supplement: pone.0167014.s006.pdf [file pone.0167014.s006.pdf]

**S4 Table. ANOVA for the  $\ln(x+10)$  transformed values of agronomic traits in rice plants at ecotype level.** AMF inoculation (inoculated and non-inoculated), ecotype (upland, irrigated and rainfed lowland) and year (1<sup>st</sup> and 2<sup>nd</sup>-year trial).

| Yield                        |    |       |       |        |          |
|------------------------------|----|-------|-------|--------|----------|
| Source of variation          | df | SS    | MS    | F      | P        |
| AMF inoculation (AMF n = 2)  | 1  | 0.322 | 0.322 | 1.801  | 0.183    |
| Ecotype (Eco n = 3)          | 2  | 7.500 | 3.750 | 20.985 | < 0.0001 |
| Year (Yr n = 2)              | 1  | 0.529 | 0.529 | 2.962  | 0.089    |
| AMF x Eco                    | 2  | 2.391 | 1.196 | 6.690  | 0.002    |
| AMF x Yr                     | 1  | 0.185 | 0.185 | 1.033  | 0.312    |
| Eco x Yr                     | 2  | 3.244 | 1.622 | 9.076  | 0.000    |
| AMF x Eco x Yr               | 2  | 0.696 | 0.348 | 1.948  | 0.149    |
| Error                        | 84 |       |       |        |          |
| Biomass                      |    |       |       |        |          |
| Source of variation          | df | SS    | MS    | F      | P        |
| AMF inoculation (AMF n = 2)  | 1  | 0.001 | 0.001 | 0.009  | 0.924    |
| Ecotype (Eco n = 3)          | 2  | 5.722 | 2.861 | 22.091 | < 0.0001 |
| Year (Yr n = 2)              | 1  | 2.164 | 2.164 | 16.705 | < 0.0001 |
| AMF x Eco                    | 2  | 0.236 | 0.118 | 0.909  | 0.407    |
| AMF x Yr                     | 1  | 0.079 | 0.079 | 0.609  | 0.437    |
| Eco x Yr                     | 2  | 0.288 | 0.144 | 1.113  | 0.333    |
| AMF x Eco x Yr               | 2  | 0.153 | 0.076 | 0.590  | 0.557    |
| Error                        | 84 |       |       |        |          |
| Harvest index (HI)           |    |       |       |        |          |
| Source of variation          | df | SS    | MS    | F      | P        |
| AMF inoculation (AMF n = 2)  | 1  | 0.601 | 0.601 | 8.536  | 0.004    |
| Ecotype (Eco n = 3)          | 2  | 0.222 | 0.111 | 1.576  | 0.213    |
| Year (Yr n = 2)              | 1  | 0.864 | 0.864 | 12.259 | 0.001    |
| AMF x Eco                    | 2  | 0.794 | 0.397 | 5.632  | 0.005    |
| AMF x Yr                     | 1  | 0.131 | 0.131 | 1.853  | 0.177    |
| Eco x Yr                     | 2  | 1.279 | 0.640 | 9.080  | 0.000    |
| AMF x Eco x Yr               | 2  | 0.072 | 0.036 | 0.514  | 0.600    |
| Error                        | 84 |       |       |        |          |
| 1000 grains weight (1000GWT) |    |       |       |        |          |
| Source of variation          | df | SS    | MS    | F      | P        |
| AMF inoculation (AMF n = 2)  | 1  | 0.004 | 0.004 | 0.113  | 0.738    |
| Ecotype (Eco n = 3)          | 2  | 0.347 | 0.173 | 4.435  | 0.015    |
| Year (Yr n = 2)              | 1  | 0.062 | 0.062 | 1.579  | 0.212    |
| AMF x Eco                    | 2  | 0.060 | 0.030 | 0.762  | 0.470    |
| AMF x Yr                     | 1  | 0.002 | 0.002 | 0.041  | 0.840    |

|                |    |       |       |       |       |
|----------------|----|-------|-------|-------|-------|
| Eco x Yr       | 2  | 0.057 | 0.029 | 0.730 | 0.485 |
| AMF x Eco x Yr | 2  | 0.096 | 0.048 | 1.234 | 0.296 |
| Error          | 84 |       |       |       |       |

#### Height

| Source of variation         | df | SS    | MS    | F      | P        |
|-----------------------------|----|-------|-------|--------|----------|
| AMF inoculation (AMF n = 2) | 1  | 0.001 | 0.001 | 0.073  | 0.788    |
| Ecotype (Eco n = 3)         | 2  | 0.556 | 0.278 | 36.745 | < 0.0001 |
| Year (Yr n = 2)             | 1  | 0.011 | 0.011 | 1.404  | 0.239    |
| AMF x Eco                   | 2  | 0.010 | 0.005 | 0.689  | 0.505    |
| AMF x Yr                    | 1  | 0.000 | 0.000 | 0.009  | 0.927    |
| Eco x Yr                    | 2  | 0.014 | 0.007 | 0.918  | 0.403    |
| AMF x Eco x Yr              | 2  | 0.019 | 0.009 | 1.230  | 0.298    |
| Error                       | 84 |       |       |        |          |

#### Tillers

| Source of variation         | df | SS    | MS    | F      | P        |
|-----------------------------|----|-------|-------|--------|----------|
| AMF inoculation (AMF n = 2) | 1  | 0.000 | 0.000 | 0.001  | 0.979    |
| Ecotype (Eco n = 3)         | 2  | 3.661 | 1.831 | 22.392 | < 0.0001 |
| Year (Yr n = 2)             | 1  | 4.333 | 4.333 | 52.998 | < 0.0001 |
| AMF x Eco                   | 2  | 0.135 | 0.068 | 0.828  | 0.441    |
| AMF x Yr                    | 1  | 0.266 | 0.266 | 3.256  | 0.075    |
| Eco x Yr                    | 2  | 0.072 | 0.036 | 0.439  | 0.646    |
| AMF x Eco x Yr              | 2  | 0.082 | 0.041 | 0.501  | 0.608    |
| Error                       | 84 |       |       |        |          |

#### Heading

| Source of variation         | df | SS    | MS    | F      | P        |
|-----------------------------|----|-------|-------|--------|----------|
| AMF inoculation (AMF n = 2) | 1  | 0.005 | 0.005 | 0.777  | 0.381    |
| Ecotype (Eco n = 3)         | 2  | 0.291 | 0.145 | 20.817 | < 0.0001 |
| Year (Yr n = 2)             | 1  | 0.045 | 0.045 | 6.384  | 0.013    |
| AMF x Eco                   | 2  | 0.001 | 0.000 | 0.043  | 0.958    |
| AMF x Yr                    | 1  | 0.002 | 0.002 | 0.223  | 0.638    |
| Eco x Yr                    | 2  | 0.021 | 0.010 | 1.483  | 0.233    |
| AMF x Eco x Yr              | 2  | 0.000 | 0.000 | 0.002  | 0.998    |
| Error                       | 84 |       |       |        |          |

#### Maturity

| Source of variation         | df | SS    | MS    | F      | P     |
|-----------------------------|----|-------|-------|--------|-------|
| AMF inoculation (AMF n = 2) | 1  | 0.004 | 0.004 | 0.755  | 0.387 |
| Ecotype (Eco n = 3)         | 2  | 0.109 | 0.054 | 10.089 | 0.000 |
| Year (Yr n = 2)             | 1  | 0.085 | 0.085 | 15.705 | 0.000 |
| AMF x Eco                   | 2  | 0.003 | 0.002 | 0.295  | 0.745 |
| AMF x Yr                    | 1  | 0.003 | 0.003 | 0.490  | 0.486 |
| Eco x Yr                    | 2  | 0.039 | 0.020 | 3.662  | 0.030 |
| AMF x Eco x Yr              | 2  | 0.004 | 0.002 | 0.345  | 0.709 |

Error

84

## Grain filling duration (GFD)

| Source of variation         | df | SS    | MS    | F      | P     |
|-----------------------------|----|-------|-------|--------|-------|
| AMF inoculation (AMF n = 2) | 1  | 0.000 | 0.000 | 0.020  | 0.888 |
| Ecotype (Eco n = 3)         | 2  | 0.147 | 0.074 | 4.161  | 0.019 |
| Year (Yr n = 2)             | 1  | 0.204 | 0.204 | 11.541 | 0.001 |
| AMF x Eco                   | 2  | 0.017 | 0.009 | 0.493  | 0.613 |
| AMF x Yr                    | 1  | 0.003 | 0.003 | 0.172  | 0.680 |
| Eco x Yr                    | 2  | 0.086 | 0.043 | 2.420  | 0.095 |
| AMF x Eco x Yr              | 2  | 0.039 | 0.019 | 1.096  | 0.339 |
| Error                       | 84 |       |       |        |       |

## Fertility

| Source of variation         | df | SS    | MS    | F      | P        |
|-----------------------------|----|-------|-------|--------|----------|
| AMF inoculation (AMF n = 2) | 1  | 0.494 | 0.494 | 13.901 | 0.000    |
| Ecotype (Eco n = 3)         | 2  | 0.101 | 0.051 | 1.428  | 0.246    |
| Year (Yr n = 2)             | 1  | 1.978 | 1.978 | 55.705 | < 0.0001 |
| AMF x Eco                   | 2  | 0.244 | 0.122 | 3.435  | 0.037    |
| AMF x Yr                    | 1  | 0.209 | 0.209 | 5.878  | 0.017    |
| Eco x Yr                    | 2  | 0.076 | 0.038 | 1.077  | 0.345    |
| AMF x Eco x Yr              | 2  | 0.116 | 0.058 | 1.630  | 0.202    |
| Error                       | 84 |       |       |        |          |
