# Supplementary material for: Field Trials Reveal Ecotype-Specific Responses to Mycorrhizal Inoculation in Rice
Source: PubMed Central journal article supplement (PMC5132163; doi:10.1371/journal.pone.0167014), 2016-12-01
Supplement: pone.0167014.s007.pdf [file pone.0167014.s007.pdf]

**S5 Table. Student's t-test for the ln (x +10) transformed values of agronomic traits in rice plants at ecotype level. AM: inoculated with AMF and NM: non-inoculated.**

| Yield                        |                  |              |                 |                 |                   |              |                 |                 |
|------------------------------|------------------|--------------|-----------------|-----------------|-------------------|--------------|-----------------|-----------------|
| Ecotype                      | First year trial |              |                 |                 | Second year trial |              |                 |                 |
|                              | AM               | NM           | <i>t</i> -value | <i>P</i> -value | AM                | NM           | <i>t</i> -value | <i>P</i> -value |
| Upland                       | <b>8.041</b>     | <b>7.213</b> | <b>2.151</b>    | <b>0.047</b>    | <b>8.358</b>      | <b>8.103</b> | <b>2.589</b>    | <b>0.020</b>    |
| Irrigated                    | 8.441            | 8.490        | -0.564          | 0.580           | 8.743             | 8.577        | 1.141           | 0.271           |
| Rainfed lowland              | 8.460            | 8.618        | -0.874          | 0.403           | <b>8.026</b>      | <b>8.362</b> | <b>-2.317</b>   | <b>0.043</b>    |
| Biomass                      |                  |              |                 |                 |                   |              |                 |                 |
| Ecotype                      | First year trial |              |                 |                 | Second year trial |              |                 |                 |
|                              | AM               | NM           | <i>t</i> -value | <i>P</i> -value | AM                | NM           | <i>t</i> -value | <i>P</i> -value |
| Upland                       | 8.949            | 8.759        | 0.853           | 0.406           | 9.232             | 9.344        | -0.672          | 0.511           |
| Irrigated                    | 9.523            | 9.461        | 0.569           | 0.577           | 9.737             | 9.609        | 0.780           | 0.447           |
| Rainfed lowland              | 9.364            | 9.462        | -0.681          | 0.511           | 9.610             | 9.821        | -0.847          | 0.417           |
| Harvest index (HI)           |                  |              |                 |                 |                   |              |                 |                 |
| Ecotype                      | First year trial |              |                 |                 | Second year trial |              |                 |                 |
|                              | AM               | NM           | <i>t</i> -value | <i>P</i> -value | AM                | NM           | <i>t</i> -value | <i>P</i> -value |
| Upland                       | <b>4.059</b>     | <b>3.509</b> | <b>3.440</b>    | <b>0.003</b>    | <b>3.947</b>      | <b>3.671</b> | <b>2.884</b>    | <b>0.011</b>    |
| Irrigated                    | 3.938            | 3.877        | 1.073           | 0.299           | 3.867             | 3.827        | 0.284           | 0.780           |
| Rainfed lowland              | 4.082            | 3.983        | 1.049           | 0.319           | 3.460             | 3.517        | -0.250          | 0.807           |
| 1000 grains weight (1000GWT) |                  |              |                 |                 |                   |              |                 |                 |
| Ecotype                      | First year trial |              |                 |                 | Second year trial |              |                 |                 |
|                              | AM               | NM           | <i>t</i> -value | <i>P</i> -value | AM                | NM           | <i>t</i> -value | <i>P</i> -value |
| Upland                       | 3.672            | 3.530        | 0.837           | 0.415           | 3.485             | 3.478        | 0.138           | 0.892           |
| Irrigated                    | 3.498            | 3.432        | 1.025           | 0.321           | 3.426             | 3.451        | -0.338          | 0.740           |
| Rainfed lowland              | 3.536            | 3.678        | -2.105          | 0.062           | 3.615             | 3.581        | 0.447           | 0.664           |
| Height                       |                  |              |                 |                 |                   |              |                 |                 |
| Ecotype                      | First year trial |              |                 |                 | Second year trial |              |                 |                 |
|                              | AM               | NM           | <i>t</i> -value | <i>P</i> -value | AM                | NM           | <i>t</i> -value | <i>P</i> -value |
| Upland                       | 4.670            | 4.674        | -0.095          | 0.926           | 4.643             | 4.677        | -0.895          | 0.384           |
| Irrigated                    | 4.475            | 4.513        | -1.154          | 0.265           | 4.548             | 4.511        | 1.193           | 0.250           |
| Rainfed lowland              | 4.516            | 4.454        | 0.880           | 0.399           | 4.529             | 4.522        | 0.161           | 0.876           |
| Tillers                      |                  |              |                 |                 |                   |              |                 |                 |
| Ecotype                      | First year trial |              |                 |                 | Second year trial |              |                 |                 |
|                              | AM               | NM           | <i>t</i> -value | <i>P</i> -value | AM                | NM           | <i>t</i> -value | <i>P</i> -value |
| Upland                       | 5.294            | 5.399        | -0.499          | 0.625           | 5.949             | 5.679        | 1.714           | 0.106           |
| Irrigated                    | 5.756            | 5.798        | -0.453          | 0.656           | 6.178             | 6.091        | 0.846           | 0.410           |
| Rainfed lowland              | 5.692            | 5.872        | -1.570          | 0.147           | 6.235             | 6.275        | -0.548          | 0.595           |
| Heading                      |                  |              |                 |                 |                   |              |                 |                 |
| Ecotype                      | First year trial |              |                 |                 | Second year trial |              |                 |                 |
|                              | AM               | NM           | <i>t</i> -value | <i>P</i> -value | AM                | NM           | <i>t</i> -value | <i>P</i> -value |
| Upland                       | 4.428            | 4.398        | 1.227           | 0.237           | 4.428             | 4.413        | 1.113           | 0.282           |
| Irrigated                    | 4.515            | 4.493        | 0.968           | 0.348           | 4.582             | 4.575        | 0.119           | 0.907           |
| Rainfed lowland              | 4.490            | 4.471        | 0.255           | 0.804           | 4.530             | 4.530        | 0.000           | 1.000           |
| Maturity                     |                  |              |                 |                 |                   |              |                 |                 |

| Ecotype         | First year trial |       |                 |                 | Second year trial |       |                 |                 |
|-----------------|------------------|-------|-----------------|-----------------|-------------------|-------|-----------------|-----------------|
|                 | AM               | NM    | <i>t</i> -value | <i>P</i> -value | AM                | NM    | <i>t</i> -value | <i>P</i> -value |
| Upland          | 4.752            | 4.696 | 1.996           | 0.063           | 4.740             | 4.738 | 0.203           | 0.842           |
| Irrigated       | 4.757            | 4.752 | 0.170           | 0.867           | 4.866             | 4.860 | 0.135           | 0.894           |
| Rainfed lowland | 4.740            | 4.729 | 0.236           | 0.818           | 4.793             | 4.793 | 0.000           | 1.000           |

  

| Grain filling duration (GFD) |                  |       |                 |                 |                   |       |                 |                 |
|------------------------------|------------------|-------|-----------------|-----------------|-------------------|-------|-----------------|-----------------|
| Ecotype                      | First year trial |       |                 |                 | Second year trial |       |                 |                 |
|                              | AM               | NM    | <i>t</i> -value | <i>P</i> -value | AM                | NM    | <i>t</i> -value | <i>P</i> -value |
| Upland                       | 3.731            | 3.626 | 1.227           | 0.238           | 3.702             | 3.728 | -0.737          | 0.472           |
| Irrigated                    | 3.542            | 3.585 | -0.497          | 0.626           | 3.736             | 3.733 | 0.109           | 0.914           |
| Rainfed lowland              | 3.551            | 3.567 | -0.310          | 0.763           | 3.634             | 3.634 | 0.000           | 1.000           |

  

| Fertility       |                  |              |                 |                 |                   |              |                 |                 |
|-----------------|------------------|--------------|-----------------|-----------------|-------------------|--------------|-----------------|-----------------|
| Ecotype         | First year trial |              |                 |                 | Second year trial |              |                 |                 |
|                 | AM               | NM           | <i>t</i> -value | <i>P</i> -value | AM                | NM           | <i>t</i> -value | <i>P</i> -value |
| Upland          | <b>4.454</b>     | <b>3.977</b> | <b>2.704</b>    | <b>0.016</b>    | <b>4.557</b>      | <b>4.463</b> | <b>2.786</b>    | <b>0.013</b>    |
| Irrigated       | <b>4.320</b>     | <b>4.162</b> | <b>2.193</b>    | <b>0.043</b>    | <b>4.625</b>      | <b>4.584</b> | <b>3.536</b>    | <b>0.003</b>    |
| Rainfed lowland | 4.372            | 4.285        | 1.003           | 0.340           | 4.556             | 4.538        | 0.476           | 0.644           |
